# Supplementary material for: Ultrafast small-scale soft electromagnetic robots
Source: PubMed Central journal article supplement (PMC9363453; doi:10.1038/s41467-022-32123-4), 2022-08-09
Supplement: 41467_2022_32123_MOESM2_ESM.pdf [file 41467_2022_32123_MOESM2_ESM.pdf]

### Ultrafast small-scale soft electromagnetic robots

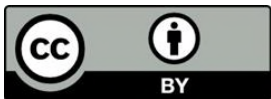

**Open Access** This file is licensed under a Creative Commons Attribution 4.0

International License, which permits use, sharing, adaptation, distribution and reproduction in any medium or format, as long as you give appropriate credit to

the original author(s) and the source, provide a link to the Creative Commons license, and indicate if changes were made. In the cases where the authors are anonymous, such as is the case for the reports of anonymous peer reviewers, author attribution should be to 'Anonymous Referee' followed by a clear attribution to the source work. The images or other third party material in this file are included in the article's Creative Commons license, unless indicated otherwise in a credit line to the material. If material is not included in the article's Creative Commons license and your intended use is not permitted by statutory regulation or exceeds the permitted use, you will need to obtain permission directly from the copyright holder. To view a copy of this license, visit <http://creativecommons.org/licenses/by/4.0/>.

**Editorial Note:** This manuscript has been previously reviewed at another journal that is not operating a transparent peer review scheme. This document only contains reviewer comments and rebuttal letters for versions considered at *Nature Communications* .

## **REVIEWERS' COMMENTS**

Reviewer #1 (Remarks to the Author):

This manuscript has passed through several rounds of review and revisions. The current version is vastly improved over the original - I enthusiastically recommend publication.

Reviewer #2 (Remarks to the Author):

I acknowledge the improvements achieved through the new L-shaped feet in regard to being able to perform high-speed locomotion on variety of planar surfaces. The extent to which the authors were able to achieve high speed locomotion of a soft robot is very interesting. There were few major flaws with the previous design, that now have been addressed. Authors presented very sound experimental works and validations. I have no further comments on the technical parts anymore.

## **Author's Reply**

We are very grateful to the reviewers for their invaluable and constructive comments. Responses to all the reviewer's comments are below.

*Itemized response to the reviewers*

## Reviewer #1

*This manuscript has passed through several rounds of review and revisions. The current version is vastly improved over the original - I enthusiastically recommend publication.*

### **Answer:**

We thank the reviewer for all the valuable suggestions which helped improve this work. We also thank for her/his appreciation of our revision.

## Reviewer #2

*I acknowledge the improvements achieved through the new L-shaped feet in regard to being able to perform high-speed locomotion on variety of planar surfaces. The extent to which the authors were able to achieve high speed locomotion of a soft robot is very interesting. There were few major flaws with the previous design, that now have been addressed. Authors presented very sound experimental works and validations. I have no further comments on the technical parts anymore.*

### **Answer:**

We thank the reviewer for all the valuable suggestions which helped improve this work. We also thank for her/his appreciation of our revision.
